# Supplementary material for: Extracts of Rheum palmatum and Aloe vera Show Beneficial Properties for the Synergistic Improvement of Oral Wound Healing
Source: MDPI journal article supplement (doi:10.3390/pharmaceutics14102060), 2022-09-27
Supplement: s1 [file s1]

Table S1: Aloe vera content as confirmed by HPLC analysis (provided by vendor).

|                            | Content (%)  | Content (mg/L) | Origin of component        |
|----------------------------|--------------|----------------|----------------------------|
| Aloverose (polysaccharide) | 14.0         | 977.1          | fresh Aloe Vera            |
| Glucose                    | 22.9         | 1605.4         | fresh Aloe Vera            |
| Malic acid                 | 20.9         | 1463.5         | fresh Aloe Vera            |
| Lactic acid                | 0.1          | 7.7            | degradation (bacterial)    |
| Citric acid                | 1.0          | 71.1           | WLM or added acidifier     |
| WLM                        | Traces       |                | whole leaf marker (WLM)    |
| Fructose                   | Detected     |                | fresh Aloe Vera            |
| Mg                         | 0.7          | 46.9           | fresh Aloe Vera            |
| Ca                         | 2.0          | 137.8          | fresh Aloe Vera            |
| Maltodextrin               | Not detected |                | formulation aid for drying |
| Acetic acid                | Detected     |                | degradation (hydrolysis)   |
